# Supplementary material for: Vapour Diffusion Sitting Drop Method to Induce Nucleation of Calcium Phosphate on Exfoliated Graphene and Graphene Oxide Flakes
Source: MDPI journal article supplement (doi:10.3390/cryst11070767), 2021-06-30
Supplement: s1 [file s1]

Archive with 1 entries (1 files):
- crystals-1265813 supplementary.pdf
