# Supplementary material for: Vapour Diffusion Sitting Drop Method to Induce Nucleation of Calcium Phosphate on Exfoliated Graphene and Graphene Oxide Flakes
Source: MDPI journal article supplement (doi:10.3390/cryst11070767), 2021-06-30
Supplement: s1 [file s1 › crystals-1265813 supplementary.pdf]

## Supplementary Materials

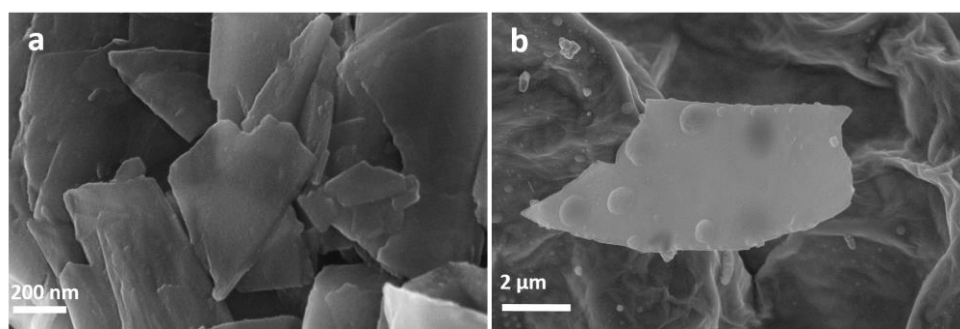

**Figure S1.** (a) SEM image showing pristine graphite and G flakes prepared by sonication-assisted liquid- phase exfoliation of graphite in presence of L-Alanine, and (b) SEM micrograph showing a commercial GO flake.
